# Supplementary material
Source: publisher site journal article supplement (https://www.dovepress.com/article/170064)
Supplement: Supplementary file 1 [file get_supplementary_file.php]

**Table S1** Coding of behavior-change techniques by BCT taxonomy v1.

| BCT # | Trial: Reference number (see reference list of main document) |    |    |    |                     |    |       |    |    |    |    |        |    |    |    |        |    |       |                      |                      |        |    |    |    |    |        |        |    | Sum | Kappa | PABAK |                         |                         |                          |                          |                          |      |      |
|-------|---------------------------------------------------------------|----|----|----|---------------------|----|-------|----|----|----|----|--------|----|----|----|--------|----|-------|----------------------|----------------------|--------|----|----|----|----|--------|--------|----|-----|-------|-------|-------------------------|-------------------------|--------------------------|--------------------------|--------------------------|------|------|
|       | 54                                                            | 55 | 56 | 57 | 58, 59 <sup>a</sup> | 60 | 61-63 | 64 | 65 | 66 | 67 | 69, 70 | 71 | 72 | 73 | 74, 75 | 76 | 77-79 | 80: IG1 <sup>b</sup> | 80: IG2 <sup>b</sup> | 81, 82 | 83 | 84 | 85 | 50 | 86, 87 | 88, 89 | 90 |     |       |       | 91-93: IG1 <sup>c</sup> | 91-93: IG2 <sup>c</sup> | 94, 95: IG1 <sup>d</sup> | 94, 95: IG2 <sup>d</sup> | 94, 95: IG3 <sup>d</sup> | 96   |      |
| 1.1   | ●                                                             | ●  | ●  |    | ●                   |    | ●     |    | ●  |    | ●  | ●      | ●  | ●  | ●  | ●      | ●  | ●     |                      | ●                    | ●      | ●  | ●  | ●  | ●  | ●      |        | ●  | ●   | ●     | ●     | ●                       |                         | ●                        | ●                        | 27                       | 0.84 | 0.88 |
| 1.2   |                                                               | ●  | ●  | ●  | ●                   | ●  | ●     | ●  |    |    | ●  | ●      | ●  | ●  | ●  | ●      | ●  | ●     |                      |                      | ●      | ●  | ●  | ●  | ●  | ●      |        | ●  | ●   |       | ●     | ●                       |                         | ●                        | ●                        | 26                       | 0.92 | 0.94 |
| 1.3   |                                                               | ●  |    |    | ●                   | ●  |       | ●  |    |    |    |        |    |    |    |        |    |       | ●                    |                      |        |    |    |    |    |        |        |    |     |       |       |                         |                         |                          | ●                        | 6                        | 0.89 | 0.94 |
| 1.4   |                                                               |    | ●  |    |                     |    |       | ●  |    |    |    | ●      |    |    |    |        |    |       | ●                    |                      | ●      | ●  | ●  | ●  | ●  | ●      |        | ●  | ●   | ●     | ●     | ●                       |                         | ●                        | ●                        | 17                       | 0.94 | 0.94 |
| 1.5   | ●                                                             | ●  | ●  |    | ●                   |    | ●     |    |    |    |    |        |    | ●  |    |        | ●  | ●     |                      |                      |        |    |    | ●  | ●  | ●      |        |    |     |       |       |                         |                         | ●                        | 12                       | 1.00                     | 1.00 |      |
| 1.6   |                                                               |    |    |    |                     | ●  |       |    |    |    |    |        | ●  |    |    |        |    | ●     |                      |                      |        |    |    |    |    |        |        |    | ●   | ●     |       |                         |                         |                          | 5                        | 1.00                     | 1.00 |      |
| 1.8   | ●                                                             |    |    |    |                     |    |       |    |    |    |    |        |    |    |    |        |    |       |                      |                      |        |    |    |    |    |        |        |    |     |       |       |                         |                         |                          | 1                        | 1.00                     | 1.00 |      |
| 1.9   |                                                               |    |    |    |                     |    |       |    |    |    |    |        |    |    |    |        |    |       |                      |                      |        |    |    |    | ●  |        |        |    |     |       |       |                         |                         |                          | 1                        | 1.00                     | 1.00 |      |
| 2.2   | ●                                                             | ●  |    |    | ●                   | ●  | ●     |    |    |    | ●  |        |    |    |    |        |    |       | ●                    |                      | ●      | ●  | ●  | ●  | ●  |        |        |    |     |       |       |                         | ●                       | 13                       | 0.70                     | 0.71                     |      |      |
| 2.3   | ●                                                             | ●  | ●  |    | ●                   | ●  | ●     | ●  |    |    | ●  | ●      | ●  | ●  | ●  |        | ●  | ●     |                      | ●                    | ●      | ●  | ●  | ●  | ●  | ●      |        | ●  | ●   | ●     | ●     | ●                       | ●                       | ●                        | 26                       | 0.92                     | 0.94 |      |
| 3.1   | ●                                                             |    | ●  | ●  | ●                   | ●  |       | ●  |    |    | ●  | ●      | ●  | ●  | ●  | ●      | ●  | ●     |                      |                      | ●      | ●  | ●  | ●  | ●  | ●      |        | ●  | ●   | ●     | ●     | ●                       | ●                       | ●                        | 27                       | 0.93                     | 0.94 |      |
| 3.2   |                                                               |    |    |    |                     |    |       |    |    |    |    |        | ●  |    |    | ●      |    |       |                      |                      |        |    |    |    |    |        |        |    | ●   |       |       |                         |                         |                          | 3                        | 0.78                     | 0.94 |      |
| 4.1   |                                                               | ●  |    | ●  | ●                   | ●  |       |    |    |    | ●  | ●      |    | ●  | ●  | ●      | ●  | ●     |                      | ●                    | ●      | ●  | ●  | ●  | ●  |        | ●      | ●  | ●   | ●     | ●     | ●                       | ●                       | ●                        | 24                       | 0.73                     | 0.76 |      |
| 5.1   |                                                               |    |    | ●  |                     |    |       |    |    |    |    |        | ●  |    |    |        |    |       | ●                    | ●                    |        |    |    |    |    |        |        |    |     |       |       |                         |                         | ●                        | ●                        | 8                        | 1.00 | 1.00 |
| 5.2   |                                                               |    |    |    |                     |    | ●     | ●  |    |    |    |        |    |    |    |        |    |       |                      |                      |        |    |    |    |    |        |        |    |     |       |       |                         |                         |                          | 2                        | 1.00                     | 1.00 |      |
| 5.3   |                                                               | ●  |    | ●  | ●                   |    | ●     |    |    |    | ●  | ●      | ●  | ●  | ●  |        |    |       |                      |                      |        |    |    |    |    |        |        | ●  |     | ●     | ●     | ●                       |                         | ●                        | ●                        | 15                       | 1.00 | 1.00 |
| 5.6   |                                                               |    |    |    |                     |    |       |    |    |    |    |        |    |    |    |        |    |       |                      |                      |        |    |    |    |    |        |        |    | ●   | ●     |       |                         |                         | ●                        | ●                        | 4                        | 1.00 | 1.00 |
| 6.1   |                                                               | ●  |    | ●  | ●                   | ●  | ●     |    |    |    | ●  | ●      |    |    |    | ●      |    |       | ●                    |                      |        |    |    |    |    |        | ●      | ●  | ●   | ●     | ●     |                         |                         |                          | 14                       | 0.82                     | 0.82 |      |
| 6.2   |                                                               |    |    |    |                     |    |       |    |    |    |    |        |    |    |    |        |    |       |                      |                      |        |    |    |    |    |        |        | ●  | ●   | ●     |       |                         | ●                       | ●                        | 5                        | 0.87                     | 0.94 |      |
| 7.1   |                                                               |    |    |    |                     | ●  |       |    |    |    |    |        |    |    |    |        |    | ●     |                      | ●                    | ●      | ●  | ●  | ●  |    |        |        | ●  |     |       |       |                         |                         |                          | 7                        | 0.77                     | 0.88 |      |
| 7.3   |                                                               |    |    |    |                     |    | ●     |    |    |    |    | ●      |    | ●  |    |        |    |       |                      | ●                    | ●      | ●  | ●  | ●  |    |        |        | ●  |     |       |       |                         |                         |                          | 8                        | 0.30                     | 0.76 |      |
| 8.1   |                                                               | ●  |    | ●  | ●                   | ●  |       | ●  | ●  |    | ●  | ●      |    | ●  | ●  |        |    |       | ●                    | ●                    | ●      | ●  | ●  |    |    |        | ●      | ●  | ●   | ●     | ●     | ●                       | ●                       | ●                        | 23                       | 0.94                     | 0.94 |      |
| 8.2   |                                                               |    |    |    |                     |    |       |    |    |    |    | ●      |    |    |    |        |    |       |                      |                      |        |    |    |    |    |        |        |    |     |       |       |                         |                         |                          | 1                        | 1.00                     | 1.00 |      |

**Table S1 (Continued)**

| BCT # | Trial: Reference number (see reference list of main document) |      |      |      |                     |      |       |      |      |      |      |        |      |      |      |        |      |       |                      |                      |        |      |      |      |      |        |        |      | Sum  | Kappa | PABAK |                         |                         |                          |                          |                          |      |      |      |      |      |
|-------|---------------------------------------------------------------|------|------|------|---------------------|------|-------|------|------|------|------|--------|------|------|------|--------|------|-------|----------------------|----------------------|--------|------|------|------|------|--------|--------|------|------|-------|-------|-------------------------|-------------------------|--------------------------|--------------------------|--------------------------|------|------|------|------|------|
|       | 54                                                            | 55   | 56   | 57   | 58, 59 <sup>a</sup> | 60   | 61-63 | 64   | 65   | 66   | 67   | 69, 70 | 71   | 72   | 73   | 74, 75 | 76   | 77-79 | 80: IG1 <sup>b</sup> | 80: IG2 <sup>b</sup> | 81, 82 | 83   | 84   | 85   | 50   | 86, 87 | 88, 89 | 90   |      |       |       | 91-93: IG1 <sup>c</sup> | 91-93: IG2 <sup>c</sup> | 94, 95: IG1 <sup>d</sup> | 94, 95: IG2 <sup>d</sup> | 94, 95: IG3 <sup>d</sup> | 96   |      |      |      |      |
| 8.7   |                                                               |      |      |      |                     | ●    |       | ●    |      |      | ●    |        | ●    |      | ●    | ●      | ●    |       |                      | ●                    | ●      | ●    | ●    |      |      | ●      | ●      | ●    |      |       |       |                         |                         | ●                        | 15                       | 0.66                     | 0.65 |      |      |      |      |
| 9.1   |                                                               |      |      |      |                     |      |       |      |      |      |      |        |      |      |      | ●      |      |       | ●                    | ●                    |        |      |      |      |      |        |        |      |      |       |       |                         |                         |                          |                          | ●                        | 4    | 0.64 | 0.88 |      |      |
| 9.2   |                                                               | ●    | ●    |      | ●                   |      |       |      |      |      |      |        | ●    | ●    |      |        |      |       |                      |                      |        |      |      |      | ●    |        |        |      |      |       |       |                         |                         |                          |                          |                          | 6    | 0.62 | 0.82 |      |      |
| 10.3  |                                                               |      |      |      |                     |      |       |      |      |      |      |        | ●    |      |      |        | ●    |       |                      |                      | ●      | ●    | ●    | ●    |      |        |        | ●    |      |       |       |                         |                         |                          |                          |                          | 7    | 1.00 | 1.00 |      |      |
| 10.4  |                                                               |      |      |      |                     | ●    | ●     |      |      |      |      |        |      |      |      |        | ●    | ●     |                      |                      | ●      | ●    | ●    | ●    |      |        |        | ●    |      |       |       |                         |                         |                          |                          |                          | 9    | 0.91 | 0.94 |      |      |
| 10.9  |                                                               | ●    |      |      | ●                   |      |       |      |      |      |      |        | ●    |      |      |        | ●    |       |                      |                      |        |      |      | ●    |      |        |        |      |      |       |       |                         |                         |                          |                          |                          |      | 5    | 1.00 | 1.00 |      |
| 11.2  |                                                               |      |      |      |                     |      |       | ●    |      |      |      |        |      |      |      |        |      |       |                      |                      |        |      |      |      |      |        |        |      |      |       |       |                         |                         |                          |                          |                          |      | 1    | 1.00 | 1.00 |      |
| 12.1  |                                                               |      |      |      |                     |      |       |      |      |      |      |        |      |      |      |        |      |       |                      |                      |        |      |      |      |      |        |        |      |      |       |       |                         |                         |                          |                          |                          |      | 1    | 1.00 | 1.00 |      |
| 12.3  |                                                               |      |      |      |                     |      |       |      |      |      |      |        | ●    |      |      |        |      |       |                      |                      |        | ●    | ●    | ●    | ●    |        |        |      |      |       |       |                         |                         |                          |                          |                          |      | 5    | 1.00 | 1.00 |      |
| 12.5  |                                                               | ●    | ●    |      | ●                   | ●    | ●     |      |      |      | ●    | ●      | ●    |      | ●    |        | ●    | ●     |                      | ●                    | ●      | ●    | ●    | ●    |      |        |        | ●    | ●    |       |       |                         |                         | ●                        | ●                        | ●                        |      | 21   | 1.00 | 1.00 |      |
| 13.2  |                                                               | ●    |      |      | ●                   |      |       |      |      |      |      |        |      |      |      |        |      |       |                      |                      |        |      |      |      |      |        |        | ●    |      |       |       |                         |                         |                          |                          |                          |      |      | 3    | 1.00 | 1.00 |
| 13.5  |                                                               |      |      |      |                     |      |       | ●    |      |      |      |        |      |      |      |        |      |       |                      |                      |        |      |      |      |      |        |        |      |      |       |       |                         |                         |                          |                          |                          |      |      | 1    | 1.00 | 1.00 |
| 15.4  |                                                               |      |      |      |                     |      |       |      |      |      |      |        |      |      |      |        |      |       |                      |                      |        |      |      |      |      |        |        |      |      |       |       |                         |                         |                          |                          |                          |      |      | 1    | 0.00 | 0.94 |
| 16.2  |                                                               |      |      |      |                     |      |       |      |      |      |      |        | ●    |      |      |        |      |       |                      |                      |        |      |      |      |      |        |        |      |      |       |       |                         |                         |                          |                          |                          |      |      | 1    | 1.00 | 1.00 |
| Sum   | 6                                                             | 15   | 8    | 7    | 15                  | 9    | 12    | 9    | 5    | 1    | 11   | 11     | 13   | 12   | 9    | 8      | 12   | 16    | 2                    | 8                    | 15     | 15   | 15   | 17   | 6    | 5      | 17     | 12   | 14   | 10    | 10    | 2                       | 12                      | 16                       |                          |                          |      |      |      |      |      |
| Kappa | 0.83                                                          | 0.93 | 0.93 | 0.83 | 0.95                | 0.86 | 1.00  | 1.00 | 1.00 | 1.00 | 1.00 | 0.94   | 0.80 | 0.67 | 0.94 | 0.92   | 0.95 | 0.90  | 1.00                 | 0.83                 | 0.94   | 0.93 | 0.89 | 0.70 | 0.91 | 1.00   | 0.82   | 0.88 | 1.00 | 0.94  | 0.87  | 1.00                    | 0.89                    | 1.00                     |                          |                          |      |      |      |      |      |
| PABAK | 0.91                                                          | 0.96 | 0.96 | 0.91 | 0.96                | 0.91 | 1.00  | 1.00 | 1.00 | 1.00 | 1.00 | 0.96   | 0.83 | 0.74 | 0.96 | 0.96   | 0.91 | 1.00  | 0.91                 | 0.96                 | 0.96   | 0.91 | 0.74 | 0.96 | 1.00 | 0.83   | 0.91   | 1.00 | 0.96 | 0.91  | 1.00  | 0.91                    | 1.00                    |                          |                          |                          |      |      |      |      |      |

**Notes:** Coding based on final agreed-upon coding, Kappa and PABAK values based on the independent coding versions of two reviewers after specification of additional coding rules. <sup>a</sup> only lifestyle program included; <sup>b</sup> IG 1: exercise recommendation, IG 2: recommendation plus motivational intervention; <sup>c</sup> IG1: tailored print material, IG2: targeted print material; <sup>d</sup> IG1: print material, IG2: pedometer, IG3: both combined.

**Numbering of BCT:** 1.1 Goal setting (behavior); 1.2 Problem solving; 1.3 Goal setting (outcome); 1.4 Action planning; 1.5 Review behavior goal(s); 1.6 Discrepancy between current behavior and goal; 1.8 Behavioral contract; 1.9 Commitment; 2.2 Feedback on behavior; 2.3 Self-monitoring of behavior; 3.1 Social support (unspecified); 3.2 Social support (practical); 4.1 Instruction on how to perform the behaviour; 5.1 Information about health consequences; 5.2 Salience of consequences; 5.6 Information about emotional consequences; 6.1 Demonstration of the behavior; 6.2 Social comparison; 7.1 Prompts/cues; 7.3 Reduce

prompts/cues; 8.1 Behavioral practice/rehearsal; 8.2 Behavior substitution; 8.7 Graded tasks; 9.1 Credible source; 9.2 Pros and cons; 10.3 Non-specific reward; 10.4 Social reward; 10.9 Self-reward; 11.2 Reduce negative emotions; 12.1 Restructuring the physical environment; 12.3 Avoidance/reducing exposure to cues for the behaviour; 12.5 Adding objects to the environment; 13.2 Framing/Reframing; 13.5 Identity associated with changed behaviour; 15.4 Self-talk; 16.2 Imaginary reward.

**Abbreviations:** Kappa, Cohen's Kappa; PABAK, Prevalence- adjusted bias- adjusted kappa; BCT, Behavior Change Technique (from BCTT v1).

**Table S2** Methodological quality of the included studies (k = 30).

| Criteria→<br>↓Author, year                                            | Intervention Integrity |              |             |          |                         |                           |                | Analyses   |              |                |                          |                              |
|-----------------------------------------------------------------------|------------------------|--------------|-------------|----------|-------------------------|---------------------------|----------------|------------|--------------|----------------|--------------------------|------------------------------|
|                                                                       | Selection bias         | Study design | Confounders | Blinding | Data collection methods | Withdrawals und drop-outs | Global ratings | Integrity* | Consistency+ | Contamination+ | Sample-size calculation+ | Intention-to-treat analysis+ |
| Bantum et al., 2014                                                   | w                      | s            | s           | m        | s                       | s                         | m              | 2          | 1            | 3              | 2                        | 2                            |
| Basen-Engquist et al., 2006                                           | w                      | s            | s           | m        | s                       | s                         | m              | 4          | 3            | 3              | 2                        | 1                            |
| Bennett et al., 2007                                                  | w                      | s            | s           | m        | s                       | s                         | m              | 1          | 3            | 3              | 2                        | 1                            |
| Bloom et al., 2008                                                    | w                      | s            | w           | m        | w                       | s                         | w              | 4          | 3            | 3              | 2                        | 1                            |
| Carmack Taylor et al., 2004 & 2006                                    | m                      | s            | w           | m        | s                       | s                         | m              | 4          | 3            | 3              | 2                        | 3                            |
| Culos-Reed et al., 2010                                               | w                      | s            | s           | m        | s                       | m                         | m              | 4          | 3            | 3              | 2                        | 1                            |
| Demark-Wahnefried et al. 2003 & 2007; Ottenbacher et al., 2012        | w                      | s            | w           | m        | s                       | s                         | w              | 4          | 3            | 3              | 1                        | 1                            |
| Hatchett et al., 2013                                                 | w                      | s            | s           | m        | s                       | s                         | m              | 4          | 3            | 3              | 2                        | 2                            |
| Hébert et al., 2012                                                   | m                      | s            | s           | m        | s                       | s                         | s              | 4          | 3            | 3              | 2                        | 1                            |
| Ibfelt et al., 2011                                                   | m                      | s            | s           | m        | w                       | m                         | m              | 4          | 3            | 3              | 2                        | 2                            |
| Irwin et al., 2008                                                    | w                      | s            | s           | m        | s                       | s                         | m              | 2          | 3            | 3              | 1                        | 1                            |
| James et al., 2011 & 2015                                             | w                      | s            | s           | w        | w                       | m                         | w              | 4          | 1            | 3              | 1                        | 1                            |
| Kim et al., 2011                                                      | w                      | s            | s           | m        | s                       | s                         | m              | 4          | 3            | 3              | 2                        | 1                            |
| Lahart et al., 2016                                                   | w                      | s            | s           | m        | s                       | s                         | m              | 4          | 3            | 3              | 1                        | 1                            |
| Ligibel et al., 2012                                                  | w                      | s            | s           | m        | s                       | s                         | m              | 1          | 3            | 3              | 1                        | 2                            |
| Livingston et al., 2011 & 2015                                        | m                      | s            | w           | m        | s                       | s                         | m              | 4          | 3            | 3              | 1                        | 1                            |
| Matthews et al., 2007                                                 | w                      | s            | s           | m        | s                       | w                         | w              | 4          | 3            | 3              | 2                        | 1                            |
| Morey et al., 2009; Demark-Wahnefried et al. 2012; Snyder et al. 2009 | w                      | s            | s           | m        | s                       | m                         | m              | 4          | 3            | 3              | 1                        | 1                            |
| Park et al., 2015                                                     | m                      | s            | s           | s        | s                       | s                         | s              | 4          | 3            | 3              | 1                        | 1                            |
| Pinto et al., 2005 & 2008                                             | m                      | s            | s           | m        | s                       | s                         | s              | 4          | 3            | 3              | 2                        | 3                            |
| Pinto et al., 2013a (breast)                                          | m                      | s            | s           | m        | s                       | m                         | s              | 4          | 3            | 3              | 1                        | 3                            |
| Pinto et al., 2013b (colon)                                           | m                      | s            | s           | m        | s                       | s                         | s              | 4          | 3            | 3              | 1                        | 1                            |
| Rabin et al., 2016                                                    | w                      | s            | s           | m        | s                       | m                         | m              | 4          | 3            | 3              | 2                        | 2                            |
| Rau et al., 2009                                                      | w                      | s            | s           | m        | w                       | m                         | w              | 4          | 3            | 3              | 2                        | 2                            |
| Reif et al., 2010 & 2013                                              | m                      | s            | s           | m        | s                       | s                         | s              | 4          | 3            | 3              | 1                        | 1                            |
| Rogers et al., 2012 & 2015                                            | m                      | s            | s           | m        | s                       | s                         | s              | 1          | 1            | 3              | 1                        | 1                            |
| Sheppard 2016                                                         | w                      | s            | s           | m        | s                       | m                         | m              | 4          | 3            | 3              | 2                        | 2                            |
| Short et al., 2012, 2013 & 2015                                       | m                      | s            | s           | s        | s                       | s                         | s              | 4          | 3            | 3              | 1                        | 1                            |
| Vallance et al., 2007 & 2008                                          | w                      | s            | s           | m        | s                       | s                         | m              | 4          | 3            | 3              | 1                        | 1                            |
| von Gruenigen et al., 2012                                            | m                      | s            | s           | m        | s                       | m                         | s              | 4          | 1            | 3              | 1                        | 1                            |

**Notes:** s, strong quality; m, moderate quality; w, weak quality. \* Rating: 1, 80%-100%; 2, 60%-79%; 3, ≤60%; 4, unclear. + Rating: 1, yes; 2, no; 3, unclear.

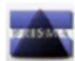

## PRISMA 2009 Checklist

| Section/topic                      | #  | Checklist item                                                                                                                                                                                                                                                                                              | Reported on page #   |
|------------------------------------|----|-------------------------------------------------------------------------------------------------------------------------------------------------------------------------------------------------------------------------------------------------------------------------------------------------------------|----------------------|
| <b>TITLE</b>                       |    |                                                                                                                                                                                                                                                                                                             |                      |
| Title                              | 1  | Identify the report as a systematic review, meta-analysis, or both.                                                                                                                                                                                                                                         | 1                    |
| <b>ABSTRACT</b>                    |    |                                                                                                                                                                                                                                                                                                             |                      |
| Structured summary                 | 2  | Provide a structured summary including, as applicable: background; objectives; data sources; study eligibility criteria, participants, and interventions; study appraisal and synthesis methods; results; limitations; conclusions and implications of key findings; systematic review registration number. | 2                    |
| <b>INTRODUCTION</b>                |    |                                                                                                                                                                                                                                                                                                             |                      |
| Rationale                          | 3  | Describe the rationale for the review in the context of what is already known.                                                                                                                                                                                                                              | 3,4                  |
| Objectives                         | 4  | Provide an explicit statement of questions being addressed with reference to participants, interventions, comparisons, outcomes, and study design (PICOS).                                                                                                                                                  | 4                    |
| <b>METHODS</b>                     |    |                                                                                                                                                                                                                                                                                                             |                      |
| Protocol and registration          | 5  | Indicate if a review protocol exists, if and where it can be accessed (e.g., Web address), and, if available, provide registration information including registration number.                                                                                                                               | 2                    |
| Eligibility criteria               | 6  | Specify study characteristics (e.g., PICOS, length of follow-up) and report characteristics (e.g., years considered, language, publication status) used as criteria for eligibility, giving rationale.                                                                                                      | 5                    |
| Information sources                | 7  | Describe all information sources (e.g., databases with dates of coverage, contact with study authors to identify additional studies) in the search and date last searched.                                                                                                                                  | 4,5                  |
| Search                             | 8  | Present full electronic search strategy for at least one database, including any limits used, such that it could be repeated.                                                                                                                                                                               | Supplement figure S2 |
| Study selection                    | 9  | State the process for selecting studies (i.e., screening, eligibility, included in systematic review, and, if applicable, included in the meta-analysis).                                                                                                                                                   | 5,6                  |
| Data collection process            | 10 | Describe method of data extraction from reports (e.g., piloted forms, independently, in duplicate) and any processes for obtaining and confirming data from investigators.                                                                                                                                  | 5,6                  |
| Data items                         | 11 | List and define all variables for which data were sought (e.g., PICOS, funding sources) and any assumptions and simplifications made.                                                                                                                                                                       | 5-7                  |
| Risk of bias in individual studies | 12 | Describe methods used for assessing risk of bias of individual studies (including specification of whether this was done at the study or outcome level), and how this information is to be used in any data synthesis.                                                                                      | 6-8                  |
| Summary measures                   | 13 | State the principal summary measures (e.g., risk ratio, difference in means).                                                                                                                                                                                                                               | 6-8                  |
| Synthesis of results               | 14 | Describe the methods of handling data and combining results of studies, if done, including measures of consistency (e.g., $I^2$ ) for each meta-analysis.                                                                                                                                                   | 6-8                  |

Figure S1 PRISMA Checklist.

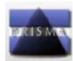

## PRISMA 2009 Checklist

| Section/topic                 | #  | Checklist item                                                                                                                                                                                           | Reported on page #               |
|-------------------------------|----|----------------------------------------------------------------------------------------------------------------------------------------------------------------------------------------------------------|----------------------------------|
| Risk of bias across studies   | 15 | Specify any assessment of risk of bias that may affect the cumulative evidence (e.g., publication bias, selective reporting within studies).                                                             | 7,8                              |
| Additional analyses           | 16 | Describe methods of additional analyses (e.g., sensitivity or subgroup analyses, meta-regression), if done, indicating which were pre-specified.                                                         | 8                                |
| <b>RESULTS</b>                |    |                                                                                                                                                                                                          |                                  |
| Study selection               | 17 | Give numbers of studies screened, assessed for eligibility, and included in the review, with reasons for exclusions at each stage, ideally with a flow diagram.                                          | 8, 9, figure 1                   |
| Study characteristics         | 18 | For each study, present characteristics for which data were extracted (e.g., study size, PICOS, follow-up period) and provide the citations.                                                             | Table 1                          |
| Risk of bias within studies   | 19 | Present data on risk of bias of each study and, if available, any outcome level assessment (see item 12).                                                                                                | 9, figure 2, Supplement table S2 |
| Results of individual studies | 20 | For all outcomes considered (benefits or harms), present, for each study: (a) simple summary data for each intervention group (b) effect estimates and confidence intervals, ideally with a forest plot. | Figure 3                         |
| Synthesis of results          | 21 | Present results of each meta-analysis done, including confidence intervals and measures of consistency.                                                                                                  | 10-12, table 2, table 3          |
| Risk of bias across studies   | 22 | Present results of any assessment of risk of bias across studies (see Item 15).                                                                                                                          | 1, 10,11 Supplement figure S3    |
| Additional analysis           | 23 | Give results of additional analyses, if done (e.g., sensitivity or subgroup analyses, meta-regression [see Item 16]).                                                                                    | Table 2                          |
| <b>DISCUSSION</b>             |    |                                                                                                                                                                                                          |                                  |
| Summary of evidence           | 24 | Summarize the main findings including the strength of evidence for each main outcome; consider their relevance to key groups (e.g., healthcare providers, users, and policy makers).                     | 13-17                            |
| Limitations                   | 25 | Discuss limitations at study and outcome level (e.g., risk of bias), and at review-level (e.g., incomplete retrieval of identified research, reporting bias).                                            | 17-18                            |
| Conclusions                   | 26 | Provide a general interpretation of the results in the context of other evidence, and implications for future research.                                                                                  | 18,19                            |
| <b>FUNDING</b>                |    |                                                                                                                                                                                                          |                                  |
| Funding                       | 27 | Describe sources of funding for the systematic review and other support (e.g., supply of data); role of funders for the systematic review.                                                               | 19                               |

From: Moher D, Liberati A, Tetzlaff J, Altman DG, The PRISMA Group (2009). Preferred Reporting Items for Systematic Reviews and Meta-Analyses: The PRISMA Statement. PLoS Med 6(7): e1000097. doi:10.1371/journal.pmed1000097

For more information, visit: [www.prisma-statement.org](http://www.prisma-statement.org). Page 2 of 2

Figure S1 (Continued)

|     |                                                                               |
|-----|-------------------------------------------------------------------------------|
| 1.  | exp Neoplasms/                                                                |
| 2.  | (cancer* or tumor* or tumour* or neoplas* or cancer survivor*).mp.            |
| 3.  | 1 or 2                                                                        |
| 4.  | exp Exercise/                                                                 |
| 5.  | exp Exercise Therapy/                                                         |
| 6.  | Physical Fitness/                                                             |
| 7.  | exp Physical endurance/                                                       |
| 8.  | exp Exercise Movement Techniques/                                             |
| 9.  | exp Motor Activity/                                                           |
| 10. | exp Muscle Strength/                                                          |
| 11. | (exercis* or aerobic* or resistance* or strength* or walk* or endurance*).mp. |
| 12. | physical active*.mp.                                                          |
| 13. | 4 or 5 or 6 or 7 or 8 or 9 or 10 or 11 or 12                                  |
| 14. | no exp Patient Education as Topic/                                            |
| 15. | (educat* or inform* or teach* or supervis* or communicat* or leaflet*).mp.    |
| 16. | survivors/                                                                    |
| 17. | survivor*.mp.                                                                 |
| 18. | exp Behavior Therapy/                                                         |
| 19. | (behavior* or behavior*).mp.                                                  |
| 20. | exp Health Promotion/                                                         |
| 21. | health promotion*.mp.                                                         |
| 22. | no exp Health Education/                                                      |
| 23. | no exp Health Knowledge, Attitudes, Practice/                                 |
| 24. | 15 or 16 or 17 or 18 or 19 or 20 or 21 or 22 or 23                            |
| 25. | 3 and 13 and 24                                                               |
| 26. | randomized controlled trial.pt                                                |
| 27. | 25 AND 26                                                                     |

**Figure S2** MEDLINE Search Strategy (via PubMed).

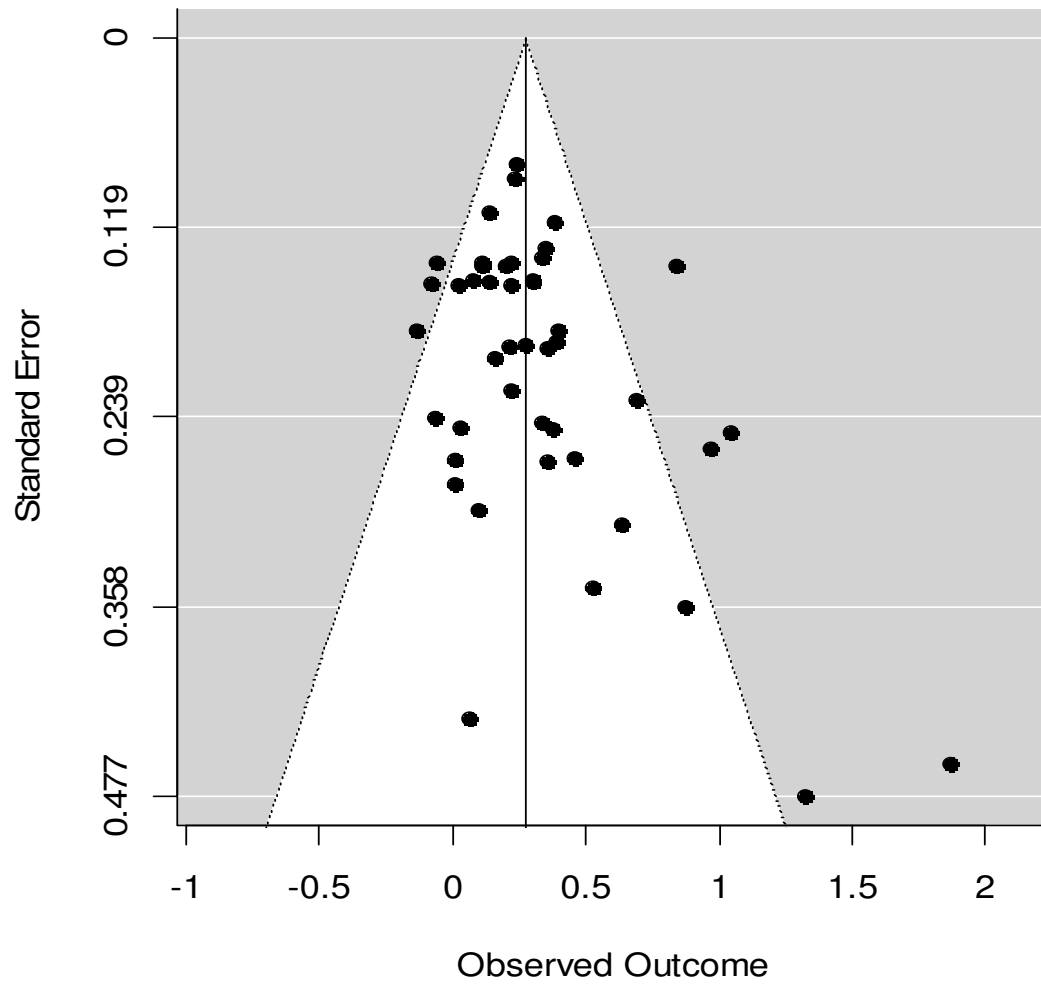

**Figure S3** Funnel plot of precision of effect size estimates ( $k = 45$ ) related to magnitude of effect sizes.
